# Supplementary material
Source: MDPI journal article supplement (https://www.mdpi.com/2673-8112/2/5/46)
Supplement: s1 [file s1]

Supplementary

# **KERRA, Mixed Medicinal Plant Extracts, Inhibits SARS-CoV-2 Targets Enzymes and Feline Coronavirus**

**Supaphorn Seetaha<sup>1,2</sup>, Phatcharin Khamplong<sup>1</sup>, Panatda Wanaragthai<sup>3</sup>, Thitinan Aiebchun<sup>1</sup>, Siriluk Ratanabunyong<sup>1</sup>, Sucheewin Krobthongand<sup>3</sup>, Yodying Yingchutrakul<sup>4</sup>, Jatuporn Rattanasrisomporn<sup>5</sup> and Kiattawee Choowongkamon<sup>1,2,3\*</sup>**

<sup>1</sup> Department of Biochemistry, Faculty of Science, Kasetsart University, Bangkok 10900, Thailand; supaporn.se@ku.th

<sup>2</sup> Kasetsart University Institute for Advanced Studies, Kasetsart University, Bangkok 10900, Thailand; kiattawee.c@ku.th

<sup>3</sup> Interdisciplinary of Genetic Engineering and Bioinformatics, Graduate School, Kasetsart University, Bangkok 10900, Thailand; sucheewin82@gmail.com

<sup>4</sup> National Omics Center, National Science and Technology Development Agency, Pathumtani, 10110, Thailand; yodying.yin@nstda.or.th

<sup>5</sup> Department of Companion Animal Clinical Sciences, Faculty of Veterinary Medicine, Kasetsart University, Bangkok 10900, Thailand; fvetjpn@ku.ac.th

\*Correspondence: kiattawee.c@ku.th ; Tel.: (66) 2-562-5555 ext. 647729; Fax: (+66)2-561-4627

Table S1. Phytochemical Profiles of KERRA extracts

| List | Name                                                                                                                                              | Formula              | Molecular Weight (Da) | Area               |
|------|---------------------------------------------------------------------------------------------------------------------------------------------------|----------------------|-----------------------|--------------------|
| 1    | 2-Methoxy-9H-xanthen-9-one                                                                                                                        | C14 H10 O3           | 226.0594              | $7.43 \times 10^9$ |
| 2    | Isorhapontigenin                                                                                                                                  | C15 H14 O4           | 276.096               | $7.36 \times 10^9$ |
| 3    | Betaine                                                                                                                                           | C5 H11 N O2          | 117.0776              | $6.84 \times 10^9$ |
| 4    | 3-[(E)-2-[(1R,4aS,5R,6R,8aR)-6-hydroxy-5-(hydroxymethyl)-5,8a-dimethyl-2-methylidene-decahydronaphthalen-1-yl]ethenyl]-2,5-dihydrofuran-2-one     | C20 H28 O4           | 314.1837              | $6.81 \times 10^9$ |
| 5    | trans-Anethole                                                                                                                                    | C10 H12 O            | 148.0869              | $4.82 \times 10^9$ |
| 6    | Eicosatetraynoic acid                                                                                                                             | C20 H24 O2           | 296.1734              | $4.05 \times 10^9$ |
| 7    | NP-020078                                                                                                                                         | C17 H28 O3           | 302.1847              | $3.28 \times 10^9$ |
| 8    | NP-003294                                                                                                                                         | C18 H16 O7           | 344.085               | $3.09 \times 10^9$ |
| 9    | 9,16-dihydroxy-6-(hydroxymethyl)-2,6,11-trimethyl-15-oxatetracyclo[8.7.0.0.0]heptadec-12-en-14-one                                                | C20 H30 O5           | 332.1946              | $2.88 \times 10^9$ |
| 10   | N1-(3-chlorophenyl)-2-[2-(trifluoromethyl)-4-quinolyl]hydrazine-1-carboxamide                                                                     | C17 H12 Cl F3 N4 O   | 380.0672              | $2.37 \times 10^9$ |
| 11   | 5-([3-chloro-5-(trifluoromethyl)-2-pyridyl]methyl)thio)-4-pentyl-4H-1,2,4-triazol-3-ol                                                            | C14 H16 Cl F3 N4 O S | 380.0687              | $2.36 \times 10^9$ |
| 12   | Choline                                                                                                                                           | C5 H13 N O           | 103.0985              | $2.34 \times 10^9$ |
| 13   | (1S,4S,5R,10S,13S,17S,19S,20R)-10-hydroxy-4,5,9,9,13,19,20-heptamethyl-24-oxahexacyclo[15.5.2.0.0.0.0]tetracos-15-en-23-one                       | C30 H46 O3           | 454.3393              | $2.20 \times 10^9$ |
| 14   | NP-016928                                                                                                                                         | C20 H28 O3           | 298.1892              | $1.92 \times 10^9$ |
| 15   | NP-006862                                                                                                                                         | C20 H32 O4           | 318.2154              | $1.49 \times 10^9$ |
| 16   | DL-Stachydrine                                                                                                                                    | C7 H13 N O2          | 143.0929              | $1.29 \times 10^9$ |
| 17   | 3-{2-[(1R,4aS,5R,6R,8aS)-6-hydroxy-5-(hydroxymethyl)-5,8a-dimethyl-2-methylidene-decahydronaphthalen-1-yl]-1-hydroxyethyl}-2,5-dihydrofuran-2-one | C20 H30 O5           | 332.1945              | $1.28 \times 10^9$ |
| 18   | Apigenin 7-O-glucuronide                                                                                                                          | C21 H18 O11          | 446.0796              | $1.09 \times 10^9$ |
| 19   | (1R,2R,5S,8R,10R,14R)-20-hydroxy-1,2,14,18,18-pentamethyl-17-oxo-8-(prop-1-en-2-yl)pentacyclo[11.8.0.0.0.0]henicosane-5-carboxylic acid           | C30 H46 O4           | 492.3153              | $1.08 \times 10^9$ |

| List | Name                                                                                                                                                                            | Formula         | Molecular Weight (Da) | Area                   |
|------|---------------------------------------------------------------------------------------------------------------------------------------------------------------------------------|-----------------|-----------------------|------------------------|
| 20   | NP-004713                                                                                                                                                                       | C15 H24 O2      | 218.1646              | 9.76 × 10 <sup>8</sup> |
| 21   | Palmitoleic Acid                                                                                                                                                                | C16 H30 O2      | 276.2053              | 7.97 × 10 <sup>8</sup> |
| 22   | 7-hydroxy-1,4a-dimethyl-9-oxo-7-(propan-2-yl)-1,2,3,4,4a,4b,5,6,7,9,10,10a-dodecahydrophenanthrene-1-carboxylic acid                                                            | C20 H30 O4      | 316.1967              | 7.52 × 10 <sup>8</sup> |
| 23   | 11-(4-chloroanilino)-2,3-dihydro-1H-cyclopenta[4,5]pyrido[1,2-a]benzimidazole-4-carbonitrile                                                                                    | C21 H15 Cl N4   | 358.1008              | 7.07 × 10 <sup>8</sup> |
| 24   | NP-009051                                                                                                                                                                       | C17 H16 O5      | 300.0958              | 6.92 × 10 <sup>8</sup> |
| 25   | NP-000615                                                                                                                                                                       | C14 H12 O4      | 244.0704              | 6.60 × 10 <sup>8</sup> |
| 26   | Oleamide                                                                                                                                                                        | C18 H35 N O     | 281.2681              | 6.16 × 10 <sup>8</sup> |
| 27   | Formononetin                                                                                                                                                                    | C16 H12 O4      | 268.0696              | 5.94 × 10 <sup>8</sup> |
| 28   | (1S,4aS,7aS)-7-(((2E)-3-phenylprop-2-enoyl)oxy)methyl)-1-(((2S,3R,4S,5S,6R)-3,4,5-trihydroxy-6-(hydroxymethyl)oxan-2-yl)oxy)-1H,4aH,5H,7aH-cyclopenta[c]pyran-4-carboxylic acid | C25 H28 O11     | 542.1191              | 5.73 × 10 <sup>8</sup> |
| 29   | 3',4'-Dimethoxyacetophenone                                                                                                                                                     | C10 H12 O3      | 180.0765              | 5.68 × 10 <sup>8</sup> |
| 30   | NP-021050                                                                                                                                                                       | C30 H48 O4      | 454.341               | 5.43 × 10 <sup>8</sup> |
| 31   | Biochanin A                                                                                                                                                                     | C16 H12 O5      | 284.0648              | 5.05 × 10 <sup>8</sup> |
| 32   | Hexadecanamide                                                                                                                                                                  | C16 H33 N O     | 255.2538              | 5.00 × 10 <sup>8</sup> |
| 33   | (9R,10R)-10-hydroxy-8,8-dimethyl-9-(((2S,3R,4S,5S,6R)-3,4,5-trihydroxy-6-(hydroxymethyl)oxan-2-yl)oxy)-2H,8H,9H,10H-pyrano[2,3-h]chromen-2-one                                  | C20 H24 O10     | 406.1218              | 4.79 × 10 <sup>8</sup> |
| 34   | (4aR,5R,6R)-6-hydroxy-4a,5-dimethyl-3-(prop-1-en-2-yl)-2,4a,5,6,7,8-hexahydronaphthalen-2-one                                                                                   | C15 H20 O2      | 214.1332              | 4.43 × 10 <sup>8</sup> |
| 35   | (1R,2S,3S,5S,11R,12R)-5-(furan-3-yl)-12-hydroxy-3,11-dimethyl-6,14-dioxatetracyclo[10.2.2.0.0.0]hexadec-15-ene-7,13-dione                                                       | C20 H22 O6      | 340.127               | 4.24 × 10 <sup>8</sup> |
| 36   | ethyl 5-amino-3-(4-methoxyphenyl)-4-oxo-3,4-dihydrothieno[3,4-d]pyridazine-1-carboxylate                                                                                        | C16 H15 N3 O4 S | 345.0813              | 4.23 × 10 <sup>8</sup> |
| 37   | NP-014517                                                                                                                                                                       | C14 H18 O9      | 352.0725              | 4.23 × 10 <sup>8</sup> |
| 38   | 4-(2,3-dihydro-1H-indol-1-yl)-1-phenyl-1H-pyrazolo[3,4-d]pyrimidine                                                                                                             | C19 H15 N5      | 313.1276              | 4.21 × 10 <sup>8</sup> |

| List | Name                                                                                                        | Formula      | Molecular Weight (Da) | Area                   |
|------|-------------------------------------------------------------------------------------------------------------|--------------|-----------------------|------------------------|
| 39   | NP-020014                                                                                                   | C15 H26 O3   | 276.1666              | 4.17 × 10 <sup>8</sup> |
| 40   | Stearoyl Ethanolamide                                                                                       | C20 H41 N O2 | 309.2994              | 4.14 × 10 <sup>8</sup> |
| 41   | D-(+)-Maltose                                                                                               | C12 H22 O11  | 364.0936              | 4.00 × 10 <sup>8</sup> |
| 42   | NP-005821                                                                                                   | C30 H46 O3   | 436.329               | 3.96 × 10 <sup>8</sup> |
| 43   | 2-(8-Hydroxy-4a,8-dimethyldecahydro-2-naphthalenyl)acrylic acid                                             | C15 H24 O3   | 274.1533              | 3.87 × 10 <sup>8</sup> |
| 44   | NP-000465                                                                                                   | C17 H14 O6   | 314.0752              | 3.83 × 10 <sup>8</sup> |
| 45   | Aflatoxin G2                                                                                                | C17 H14 O7   | 330.0696              | 3.48 × 10 <sup>8</sup> |
| 46   | 3-Hydroxy-2-methylpyridine                                                                                  | C6 H7 N O    | 109.0514              | 3.42 × 10 <sup>8</sup> |
| 47   | 1-(4-hydroxyphenyl)propane-1,2-diol                                                                         | C9 H12 O3    | 190.061               | 3.22 × 10 <sup>8</sup> |
| 48   | Agmatine                                                                                                    | C5 H14 N4    | 130.1204              | 3.14 × 10 <sup>8</sup> |
| 49   | Cinchonidine                                                                                                | C19 H22 N2 O | 294.1768              | 3.09 × 10 <sup>8</sup> |
| 50   | trans-3-Indoleacrylic acid                                                                                  | C11 H9 N O2  | 187.0613              | 2.96 × 10 <sup>8</sup> |
| 51   | NP-012972                                                                                                   | C14 H24 O3   | 222.1588              | 2.95 × 10 <sup>8</sup> |
| 52   | 5-[5-(methoxycarbonyl)-5,8a-dimethyl-2-methylidene-decahydronaphthalen-1-yl]-3-methylpentanoic acid         | C21 H34 O4   | 350.2412              | 2.90 × 10 <sup>8</sup> |
| 53   | 4-Methylumbelliferone                                                                                       | C10 H8 O3    | 176.0454              | 2.84 × 10 <sup>8</sup> |
| 54   | Trigonelline                                                                                                | C7 H7 N O2   | 96.01952              | 2.78 × 10 <sup>8</sup> |
| 55   | D-(+)-Pyroglutamic Acid                                                                                     | C5 H7 N O3   | 129.0412              | 2.71 × 10 <sup>8</sup> |
| 56   | (5S,6S)-5-Hydroxy-4-methoxy-6-[(E)-2-phenylvinyl]-5,6-dihydro-2H-pyran-2-one                                | C14 H14 O4   | 246.0866              | 2.49 × 10 <sup>8</sup> |
| 57   | 5-(4-carboxy-3-methylbutyl)-5,6,8a-trimethyl-3-oxo-3,4,4a,5,6,7,8,8a-octahydronaphthalene-1-carboxylic acid | C20 H30 O5   | 372.187               | 2.49 × 10 <sup>8</sup> |
| 58   | Monoolein                                                                                                   | C21 H40 O4   | 356.2886              | 2.41 × 10 <sup>8</sup> |
| 59   | Ageratriol                                                                                                  | C15 H24 O3   | 234.159               | 2.17 × 10 <sup>8</sup> |
| 60   | 5-hydroxy-6,7-dimethoxy-2-phenyl-4H-chromen-4-one                                                           | C17 H14 O5   | 298.0807              | 2.16 × 10 <sup>8</sup> |
| 61   | NP-006105                                                                                                   | C15 H16 O5   | 298.0799              | 2.15 × 10 <sup>8</sup> |
| 62   | Cryptotanshinone                                                                                            | C19 H20 O3   | 296.1373              | 2.13 × 10 <sup>8</sup> |
| 63   | 4-Hydroxybenzaldehyde                                                                                       | C7 H6 O2     | 122.0354              | 2.09 × 10 <sup>8</sup> |
| 64   | octadec-9-ynoic acid                                                                                        | C18 H32 O2   | 262.2267              | 2.08 × 10 <sup>8</sup> |
| 65   | (1S,2R,9R,11R,12R,15R)-11-hydroxy-2,6,9,15-tetramethyl-13-                                                  | C18 H20 O5   | 338.1087              | 2.02 × 10 <sup>8</sup> |

| List | Name                                                                                                                              | Formula                                                         | Molecular Weight (Da) | Area                   |
|------|-----------------------------------------------------------------------------------------------------------------------------------|-----------------------------------------------------------------|-----------------------|------------------------|
|      | oxatetracyclo[10.2.1.0.0.0]pentadeca-4,6-diene-3,8,14-trione                                                                      |                                                                 |                       |                        |
| 66   | Harpagoside                                                                                                                       | C <sub>24</sub> H <sub>30</sub> O <sub>11</sub>                 | 516.1549              | 2.01 × 10 <sup>8</sup> |
| 67   | NP-008998                                                                                                                         | C <sub>16</sub> H <sub>18</sub> O <sub>6</sub>                  | 328.0906              | 2.01 × 10 <sup>8</sup> |
| 68   | Resorcinol monoacetate                                                                                                            | C <sub>8</sub> H <sub>8</sub> O <sub>3</sub>                    | 152.0455              | 1.86 × 10 <sup>8</sup> |
| 69   | (+)-ar-Turmerone                                                                                                                  | C <sub>15</sub> H <sub>20</sub> O                               | 216.1488              | 1.85 × 10 <sup>8</sup> |
| 70   | Benzyl methacrylate                                                                                                               | C <sub>11</sub> H <sub>12</sub> O <sub>2</sub>                  | 158.0713              | 1.83 × 10 <sup>8</sup> |
| 71   | Acetophenone                                                                                                                      | C <sub>8</sub> H <sub>8</sub> O                                 | 120.0555              | 1.76 × 10 <sup>8</sup> |
| 72   | Avocadyne 1-acetate                                                                                                               | C <sub>19</sub> H <sub>34</sub> O <sub>4</sub>                  | 348.2256              | 1.73 × 10 <sup>8</sup> |
| 73   | (3R,4R)-4-[(3,4-dimethoxyphenyl)methyl]-3-[(4-hydroxy-3-methoxyphenyl)methyl]oxolan-2-one                                         | C <sub>21</sub> H <sub>24</sub> O <sub>6</sub>                  | 394.1348              | 1.64 × 10 <sup>8</sup> |
| 74   | [5-(2-methylimidazo[1,2-a]pyridin-3-yl)-1H-pyrazol-1-yl][4-(trifluoromethyl)phenyl]methanone                                      | C <sub>19</sub> H <sub>13</sub> F <sub>3</sub> N <sub>4</sub> O | 370.1053              | 1.62 × 10 <sup>8</sup> |
| 75   | Apocynin                                                                                                                          | C <sub>9</sub> H <sub>10</sub> O <sub>3</sub>                   | 166.0613              | 1.60 × 10 <sup>8</sup> |
| 76   | 1-Linoleoyl glycerol                                                                                                              | C <sub>21</sub> H <sub>38</sub> O <sub>4</sub>                  | 354.273               | 1.59 × 10 <sup>8</sup> |
| 77   | NP-005146                                                                                                                         | C <sub>16</sub> H <sub>18</sub> O <sub>4</sub>                  | 256.1068              | 1.52 × 10 <sup>8</sup> |
| 78   | 4-(4-methoxyphenyl)-2-(4-pyridyl)-1,3-thiazole hydrobromide                                                                       | C <sub>15</sub> H <sub>12</sub> N <sub>2</sub> O <sub>2</sub> S | 268.0698              | 1.48 × 10 <sup>8</sup> |
| 79   | N <sub>2</sub> -[[(3R,4S)-3-[[5-(4-methoxyphenyl)-1,2-oxazol-3-yl]methyl]-4-piperidinyl]acetyl]-N <sub>2</sub> -methylglycinamide | C <sub>21</sub> H <sub>28</sub> N <sub>4</sub> O <sub>4</sub>   | 422.1893              | 1.44 × 10 <sup>8</sup> |
| 80   | Tridemorph                                                                                                                        | C <sub>19</sub> H <sub>39</sub> N <sub>2</sub> O                | 297.3003              | 1.44 × 10 <sup>8</sup> |
| 81   | Resveratrol                                                                                                                       | C <sub>14</sub> H <sub>12</sub> O <sub>3</sub>                  | 228.0757              | 1.40 × 10 <sup>8</sup> |
| 82   | L-Phenylalanine                                                                                                                   | C <sub>9</sub> H <sub>11</sub> N <sub>2</sub> O <sub>2</sub>    | 165.077               | 1.36 × 10 <sup>8</sup> |
| 83   | Tanshinone IIA                                                                                                                    | C <sub>19</sub> H <sub>18</sub> O <sub>3</sub>                  | 294.1217              | 1.35 × 10 <sup>8</sup> |
| 84   | (2S,3S,4S,5R,6S)-6-[[5,7-dihydroxy-2-(4-hydroxyphenyl)-4-oxo-4H-chromen-3-yl]oxy]-3,4,5-trihydroxyoxane-2-carboxylic acid         | C <sub>21</sub> H <sub>18</sub> O <sub>12</sub>                 | 462.0765              | 1.34 × 10 <sup>8</sup> |
| 85   | Scutellarin                                                                                                                       | C <sub>21</sub> H <sub>18</sub> O <sub>12</sub>                 | 462.0745              | 1.34 × 10 <sup>8</sup> |
| 86   | Bicyclo Prostaglandin E <sub>2</sub>                                                                                              | C <sub>20</sub> H <sub>30</sub> O <sub>4</sub>                  | 178.0962              | 1.30 × 10 <sup>8</sup> |
| 87   | (4aS,9aR)-7-[2-(2,3-dimethoxyphenyl)ethyl]-2-[(4-methoxyphenyl)acetyl]decahydro-6H-pyrido[3,4-d]azepin-6-one                      | C <sub>28</sub> H <sub>36</sub> N <sub>2</sub> O <sub>5</sub>   | 502.2485              | 1.29 × 10 <sup>8</sup> |

| List | Name                                                                                                                               | Formula       | Molecular Weight (Da) | Area                   |
|------|------------------------------------------------------------------------------------------------------------------------------------|---------------|-----------------------|------------------------|
| 88   | Apigenin                                                                                                                           | C15 H10 O5    | 270.0495              | 1.29 × 10 <sup>8</sup> |
| 89   | 15-Deoxy-Δ12,14-prostaglandin J2-2-glycerol ester                                                                                  | C23 H34 O5    | 390.234               | 1.24 × 10 <sup>8</sup> |
| 90   | 3-O-β-D-Glucopyranosylandrographolide                                                                                              | C26 H40 O10   | 534.2375              | 1.22 × 10 <sup>8</sup> |
| 91   | Nalidixic acid                                                                                                                     | C12 H12 N2 O3 | 232.086               | 1.22 × 10 <sup>8</sup> |
| 92   | methyl 2-ethyl-4-[(3R,4R,5S)-5-hydroxy-4,5-dimethyl-2-oxooxolan-3-yl]-2-methyl-3-oxobutanoate                                      | C14 H22 O6    | 308.1196              | 1.21 × 10 <sup>8</sup> |
| 93   | Vanillin                                                                                                                           | C8 H8 O3      | 152.0453              | 1.21 × 10 <sup>8</sup> |
| 94   | (5S,6S)-5-hydroxy-4-methoxy-6-(2-phenylethyl)-5,6-dihydro-2H-pyran-2-one                                                           | C14 H16 O4    | 270.0855              | 1.17 × 10 <sup>8</sup> |
| 95   | Ethylmorphine                                                                                                                      | C19 H23 N O3  | 313.164               | 1.15 × 10 <sup>8</sup> |
| 96   | 6-Methyl-2-pyridinemethanol                                                                                                        | C7 H9 N O     | 123.0668              | 1.12 × 10 <sup>8</sup> |
| 97   | NP-020214                                                                                                                          | C16 H32 O4    | 310.2107              | 1.12 × 10 <sup>8</sup> |
| 98   | (1R,9S)-11-(Cyclohexylcarbonyl)-5-(2-methylphenyl)-7,11-diazatricyclo[7.3.1.0 <sup>2,7</sup> ]trideca-2,4-dien-6-one               | C25 H30 N2 O2 | 390.2329              | 1.10 × 10 <sup>8</sup> |
| 99   | 3',4'-Trimethylene-α-methylamino-valerophenone                                                                                     | C15 H21 N O   | 231.1596              | 1.10 × 10 <sup>8</sup> |
| 100  | NP-018817                                                                                                                          | C15 H24 O4    | 290.146               | 1.10 × 10 <sup>8</sup> |
| 101  | NP-002113                                                                                                                          | C20 H28 O4    | 354.1763              | 1.09 × 10 <sup>8</sup> |
| 102  | NP-002322                                                                                                                          | C18 H32 O4    | 334.2082              | 1.09 × 10 <sup>8</sup> |
| 103  | 2-{4-[(1S,3aR,4R,6aR)-4-(3,4-dimethoxyphenyl)-hexahydrofuro[3,4-c]furan-1-yl]-2-methoxyphenoxy}-6-(hydroxymethyl)oxane-3,4,5-triol | C27 H34 O11   | 556.1855              | 1.06 × 10 <sup>8</sup> |
| 104  | NP-020205                                                                                                                          | C11 H16 O4    | 234.0864              | 1.05 × 10 <sup>8</sup> |
| 105  | (2S,3R,4S,5S,6R)-2-{3-hydroxy-5-[(E)-2-(4-hydroxy-3-methoxyphenyl)ethenyl]phenoxy}-6-(hydroxymethyl)oxane-3,4,5-triol              | C21 H24 O9    | 442.1185              | 1.03 × 10 <sup>8</sup> |
| 106  | 3,3',5,5'-Tetramethyldiphenoquinone                                                                                                | C16 H16 O2    | 240.112               | 1.02 × 10 <sup>8</sup> |
| 107  | 3-Hydroxypyridine                                                                                                                  | C5 H5 N O     | 95.03605              | 1.02 × 10 <sup>8</sup> |
| 108  | Rhamnetin                                                                                                                          | C16 H12 O7    | 316.0541              | 1.01 × 10 <sup>8</sup> |
| 109  | 4-Guanidinobutyric acid                                                                                                            | C5 H11 N3 O2  | 145.0835              | 1.00 × 10 <sup>8</sup> |
| 110  | Methoxyacetyl fentanyl                                                                                                             | C22 H28 N2 O2 | 352.2184              | 99,759,859             |
| 111  | (11E,15Z)-9,10,13-trihydroxyoctadeca-11,15-dienoic acid                                                                            | C18 H32 O5    | 310.2108              | 96,929,532             |
| 112  | 2-(3,4-dihydroxyphenyl)-3,5,7-trihydroxy-6-methyl-4H-chromen-4-one                                                                 | C16 H12 O7    | 316.0554              | 95,611,487             |
| 113  | Chlorogenic acid                                                                                                                   | C16 H18 O9    | 376.0729              | 95,367,804             |

| List | Name                                                                                                                                                                | Formula          | Molecular Weight (Da) | Area       |
|------|---------------------------------------------------------------------------------------------------------------------------------------------------------------------|------------------|-----------------------|------------|
| 114  | (2E)-3-(4-Hydroxyphenyl)-N-[2-(4-hydroxyphenyl)ethyl]acrylamide                                                                                                     | C17 H17 N O3     | 283.1178              | 93,886,662 |
| 115  | (3aS,5aS,9bR)-5a,9-dimethyl-3-methylidene-2H,3H,3aH,4H,5H,5aH,6H,7H,8H,9bH-naphtho[1,2-b]furan-2,5-dione                                                            | C15 H18 O3       | 228.1121              | 93,010,999 |
| 116  | Daidzein                                                                                                                                                            | C15 H10 O4       | 254.055               | 92,720,175 |
| 117  | N1-cyclooctyl-4-hydroxy-1-piperidinecarbothioamide                                                                                                                  | C14 H26 N2 O S   | 292.1622              | 92,451,286 |
| 118  | N-[5-Hydroxy-4,8a-dimethyl-6-[1-oxo-1-(4-thiomorpholinyl)-2-propanyl]-4,4a,5,6,7,8,8a,9-octahydronaphtho[2,3-d][1,3]thiazol-2-yl]-1-methyl-1H-pyrrole-2-carboxamide | C26 H36 N4 O3 S2 | 516.227               | 91,472,896 |
| 119  | T-2 Triol                                                                                                                                                           | C20 H30 O7       | 404.1788              | 88,975,025 |
| 120  | 5-((2R,3S)-6-Hydroxy-2-(4-hydroxyphenyl)-4-[(E)-2-(4-hydroxyphenyl)vinyl]-2,3-dihydro-1-benzofuran-3-yl)-1,3-benzenediol                                            | C28 H22 O6       | 454.1364              | 88,307,788 |
| 121  | NP-021293                                                                                                                                                           | C30 H48 O4       | 454.3399              | 88,067,373 |
| 122  | 15-(5-hydroxy-6-methylhept-6-en-2-yl)-7,7,12,16-tetramethylpentacyclo[9.7.0.0.0.0.0]octadecan-6-ol                                                                  | C30 H50 O2       | 424.3658              | 87,922,433 |
| 123  | Guanine                                                                                                                                                             | C5 H5 N5 O       | 151.0485              | 84,892,990 |
| 124  | NP-005474                                                                                                                                                           | C21 H22 O9       | 418.1217              | 83,775,319 |
| 125  | 2,2,6,6-Tetramethyl-1-piperidinol (TEMPO)                                                                                                                           | C9 H19 N O       | 157.1448              | 82,866,884 |
| 126  | NP-003141                                                                                                                                                           | C21 H20 O9       | 438.0873              | 82,431,805 |
| 127  | Coumarin                                                                                                                                                            | C9 H6 O2         | 146.0348              | 82,355,781 |
| 128  | Oleanolic acid                                                                                                                                                      | C30 H48 O3       | 438.3444              | 81,946,065 |
| 129  | Carbaprostacyclin                                                                                                                                                   | C21 H34 O4       | 332.231               | 81,495,844 |
| 130  | DL-Tryptophan                                                                                                                                                       | C11 H12 N2 O2    | 204.0875              | 80,563,233 |
| 131  | Octylphosphonic acid                                                                                                                                                | C8 H19 O3 P      | 194.1034              | 79,695,417 |
| 132  | Trioxsalen                                                                                                                                                          | C14 H12 O3       | 228.0755              | 78,976,414 |
| 133  | trans,trans-2,4-Heptadienal                                                                                                                                         | C7 H10 O         | 110.0718              | 78,810,316 |
| 134  | NP-014287                                                                                                                                                           | C18 H32 O3       | 318.213               | 77,233,880 |
| 135  | (±)8-HEPE                                                                                                                                                           | C20 H30 O3       | 300.2053              | 75,941,839 |
| 136  | Cholest-4-en-3-one                                                                                                                                                  | C27 H44 O        | 384.3348              | 75,360,861 |
| 137  | Adenosine                                                                                                                                                           | C10 H13 N5 O4    | 267.0936              | 74,816,007 |
| 138  | 4-[2-(2-oxo-1-imidazolidinyl)ethyl]-1λ~6~,4-thiazinane-1,1-dione                                                                                                    | C9 H17 N3 O3 S   | 269.0845              | 74,332,839 |

| List | Name                                                                                                                        | Formula         | Molecular Weight (Da) | Area       |
|------|-----------------------------------------------------------------------------------------------------------------------------|-----------------|-----------------------|------------|
| 139  | {(3S)-3-[5-(2-Fluorophenyl)-1,3,4-oxadiazol-2-yl]-1-pyrrolidinyl}(phenyl)methanone                                          | C19 H16 F N3 O2 | 337.1273              | 74,001,254 |
| 140  | 4-Aminophenol                                                                                                               | C6 H7 N O       | 109.0515              | 73,491,150 |
| 141  | Lupeol                                                                                                                      | C30 H50 O       | 426.3811              | 72,201,114 |
| 142  | Methyldienolone                                                                                                             | C19 H26 O2      | 286.1891              | 72,082,535 |
| 143  | 4-phenoxyphenyl 4-hydroxypiperidine-1-carboxylate                                                                           | C18 H19 N O4    | 335.1092              | 71,715,614 |
| 144  | 4-methoxy-6-(prop-2-en-1-yl)-2H-1,3-benzodioxole                                                                            | C11 H12 O3      | 160.0504              | 71,158,053 |
| 145  | NP-019848                                                                                                                   | C27 H46 N6 O7   | 566.3517              | 70,855,091 |
| 146  | DL-Arginine                                                                                                                 | C6 H14 N4 O2    | 174.1096              | 70,649,859 |
| 147  | 1,4:3,6-Dianhydro-2-deoxy-5-O-[(4-phenoxyphenyl)carbamoyl]-2-[(2-pyrazinylcarbonyl)amino]-D-glucitol                        | C24 H22 N4 O6   | 484.1285              | 69,257,250 |
| 148  | NP-020240                                                                                                                   | C14 H20 O3      | 186.1014              | 69,113,668 |
| 149  | NP-019811                                                                                                                   | C6 H7 N O2      | 125.0464              | 68,696,381 |
| 150  | 1-{4-[2-(7-methoxy-2H-1,3-benzodioxol-5-yl)ethyl]phenoxy}-3-methylbutane-2,3-diol                                           | C21 H26 O6      | 396.1502              | 65,453,635 |
| 151  | NP-007909                                                                                                                   | C13 H20 O3      | 206.1285              | 64,617,637 |
| 152  | Isobornyl methacrylate                                                                                                      | C14 H22 O2      | 222.1598              | 63,603,104 |
| 153  | Kanosamine                                                                                                                  | C6 H13 N O5     | 161.0671              | 63,573,239 |
| 154  | NP-013210                                                                                                                   | C12 H14 O3      | 188.0817              | 63,140,447 |
| 155  | Cyclo(leucylprolyl)                                                                                                         | C11 H18 N2 O2   | 210.1347              | 60,426,370 |
| 156  | 12-Oxo phytodienoic acid                                                                                                    | C18 H28 O3      | 292.1999              | 59,586,148 |
| 157  | NP-003024                                                                                                                   | C12 H14 O5      | 260.0652              | 58,967,173 |
| 158  | 5,7-Dihydroxy-2-(4-hydroxyphenyl)-6,8-bis[3,4,5-trihydroxy-6-(hydroxymethyl)tetrahydro-2H-pyran-2-yl]-4H-chromen-4-one      | C27 H30 O15     | 594.1521              | 58,459,871 |
| 159  | (±)13-HpODE                                                                                                                 | C18 H32 O4      | 294.2159              | 58,317,690 |
| 160  | Emodin                                                                                                                      | C15 H10 O5      | 270.0497              | 58,314,124 |
| 161  | Maltol                                                                                                                      | C6 H6 O3        | 126.0303              | 57,637,035 |
| 162  | (2R)-7-Methoxy-3-oxo-3,4-dihydro-2H-1,4-benzoxazin-2-yl β-D-glucopyranoside                                                 | C15 H19 N O9    | 379.0838              | 57,293,685 |
| 163  | 9-Oxo-ODE                                                                                                                   | C18 H30 O3      | 294.2153              | 57,068,495 |
| 164  | 6-[(2E,6E)-7-(5-hydroxy-3-methyl-2-oxocyclopent-3-en-1-yl)-6-methylhepta-2,6-dien-2-yl]-3-methyl-5,6-dihydro-2H-pyran-2-one | C20 H26 O4      | 330.1785              | 56,752,848 |



| List | Name                                                                                                                             | Formula       | Molecular Weight (Da) | Area       |
|------|----------------------------------------------------------------------------------------------------------------------------------|---------------|-----------------------|------------|
| 165  | 4a,5-dihydroxy-7-methyl-1-[[3,4,5-trihydroxy-6-(hydroxymethyl)oxan-2-yl]oxy]-1H,4aH,5H,6H,7H,7aH-cyclopenta[c]pyran-7-yl acetate | C17 H26 O11   | 428.125               | 56,359,580 |
| 166  | 4-Amino-2-pyrazin-2-ylpyrimidine-5-carbonitrile                                                                                  | C9 H6 N6      | 198.0656              | 56,098,264 |
| 167  | 3-[4-methyl-1-(2-methylpropanoyl)-3-oxocyclohexyl]butanoic acid                                                                  | C15 H24 O4    | 290.1454              | 55,375,637 |
| 168  | 5-hydroxy-2-(4-hydroxyphenyl)-6-methoxy-7-[[[(2S,3R,4S,5S,6R)-3,4,5-trihydroxy-6-(hydroxymethyl)oxan-2-yl]oxy]-4H-chromen-4-one  | C22 H22 O11   | 462.111               | 55,103,926 |
| 169  | Bis(4-ethylbenzylidene)sorbitol                                                                                                  | C24 H30 O6    | 414.1994              | 55,038,320 |
| 170  | NP-008274                                                                                                                        | C15 H20 O4    | 286.1169              | 54,710,900 |
| 171  | Diosgenin                                                                                                                        | C27 H42 O3    | 396.2978              | 54,355,608 |
| 172  | 4-Indolecarbaldehyde                                                                                                             | C9 H7 N O     | 145.0512              | 53,929,932 |
| 173  | 6-Hydroxy-1-(hydroxymethyl)-5-{2-[(4-methoxybenzyl)amino]-2-oxoethyl}-1,4a-dimethyldecahydro-2-naphthalenyl propylcarbamate      | C27 H42 N2 O6 | 490.3                 | 53,381,782 |
| 174  | L-Tyrosine                                                                                                                       | C9 H11 N O3   | 181.0718              | 50,877,541 |
| 175  | NP-013736                                                                                                                        | C10 H16 N2 O2 | 196.119               | 48,955,487 |
| 176  | NP-013326                                                                                                                        | C15 H16 O4    | 242.091               | 48,052,999 |
| 177  | 3,5-di-tert-Butyl-4-hydroxybenzaldehyde                                                                                          | C15 H22 O2    | 234.1592              | 47,438,366 |
| 178  | Aloe-emodin                                                                                                                      | C15 H10 O5    | 270.0495              | 45,963,974 |
| 179  | (5E)-7-methylidene-10-oxo-4-(propan-2-yl)undec-5-enoic acid                                                                      | C15 H24 O3    | 274.1514              | 45,813,299 |
| 180  | [2-(hydroxymethyl)-5,5,8a-trimethyl-1,4,4a,5,6,7,8,8a-octahydronaphthalen-1-yl]methanol                                          | C15 H26 O2    | 260.1722              | 45,422,507 |
| 181  | NP-008993                                                                                                                        | C18 H34 O4    | 336.2236              | 44,613,421 |
| 182  | NP-015559                                                                                                                        | C17 H14 O7    | 330.0699              | 44,353,657 |
| 183  | Oleoyl ethanolamide                                                                                                              | C20 H39 N O2  | 325.2943              | 43,929,483 |
| 184  | 4-Methoxybenzaldehyde                                                                                                            | C8 H8 O2      | 136.051               | 43,889,807 |
| 185  | 1-adamantyl(1,4-thiazinan-4-yl)methanone                                                                                         | C15 H23 N O S | 265.1494              | 43,135,442 |
| 186  | 4'-(Imidazol-1-yl)acetophenone                                                                                                   | C11 H10 N2 O  | 186.0772              | 43,124,736 |
| 187  | 9-hydroxy-2,10,10-trimethyltricyclo[6.3.0.0.0]undec-6-ene-6-carboxylic acid                                                      | C15 H22 O3    | 232.1434              | 43,120,862 |
| 188  | Tetranor-12(S)-HETE                                                                                                              | C16 H26 O3    | 288.1691              | 43,117,886 |
| 189  | N-Acetyloronithine                                                                                                               | C7 H14 N2 O3  | 142.0763              | 42,842,000 |

| List | Name                                                                                                                             | Formula        | Molecular Weight (Da) | Area       |
|------|----------------------------------------------------------------------------------------------------------------------------------|----------------|-----------------------|------------|
| 190  | Aloesin                                                                                                                          | C19 H22 O9     | 394.1197              | 42,676,729 |
| 191  | NP-000308                                                                                                                        | C16 H12 O6     | 300.0597              | 42,565,135 |
| 192  | NP-011220                                                                                                                        | C11 H18 N2 O2  | 210.1344              | 42,264,024 |
| 193  | 2-(3,4-Dihydroxyphenyl)ethyl 3-O-(6-deoxy-β-L-mannopyranosyl)-6-O-[(2E)-3-(3,4-dihydroxyphenyl)-2-propenoyl]-β-D-glucopyranoside | C29 H36 O15    | 646.1788              | 41,860,287 |
| 194  | D-Raffinose                                                                                                                      | C18 H32 O16    | 526.1444              | 41,677,143 |
| 195  | 4-[(E)-2-[3-(β-D-Glucopyranosyloxy)-5-hydroxyphenyl]vinyl]-2-methoxyphenyl β-D-glucopyranoside                                   | C27 H34 O14    | 582.1873              | 41,383,036 |
| 196  | 3-(propan-2-yl)-octahydropyrrolo[1,2-a]pyrazine-1,4-dione                                                                        | C10 H16 N2 O2  | 196.1198              | 41,279,599 |
| 197  | (2S,5aS,8aR)-6-Benzyl-1-methyl-2-[3-(4-morpholinyl)-3-oxopropyl]octahydropyrrolo[3,2-E][1,4]diazepin-5(2H)-one                   | C22 H32 N4 O3  | 422.2231              | 41,275,425 |
| 198  | Nicotinic acid                                                                                                                   | C6 H5 N O2     | 123.0306              | 41,260,722 |
| 199  | Betaxolol                                                                                                                        | C18 H29 N O3   | 307.211               | 40,881,749 |
| 200  | 2,6-Dimethyl-γ-pyrone                                                                                                            | C7 H8 O2       | 124.051               | 40,804,739 |
| 201  | (1aR,1bR,2R,3R,7R,7aS)-1b,2-dimethyl-7a-(prop-1-en-2-yl)-1aH,1bH,2H,3H,4H,5H,7H,7aH-naphtho[1,2-b]oxirene-3,7-diol               | C15 H22 O3     | 232.1435              | 40,457,030 |
| 202  | 4-(2-methoxyphenyl)-1-(3-phenyl-1,2,4-thiadiazol-5-yl)piperidine                                                                 | C20 H21 N3 O S | 351.1428              | 39,297,321 |
| 203  | SB236057A                                                                                                                        | C33 H34 N4 O3  | 534.2567              | 39,140,029 |
| 204  | Indole                                                                                                                           | C8 H7 N        | 117.0563              | 39,050,503 |
| 205  | Ambrosic acid                                                                                                                    | C15 H20 O4     | 286.115               | 38,842,262 |
| 206  | Kynurenic acid                                                                                                                   | C10 H7 N O3    | 189.0406              | 38,727,203 |
| 207  | 8-{3-Oxo-2-[(2E)-2-penten-1-yl]-1-cyclopenten-1-yl}octanoic acid                                                                 | C18 H28 O3     | 292.2001              | 38,683,339 |
| 208  | NP-020327                                                                                                                        | C21 H24 O8     | 426.1237              | 38,580,877 |
| 209  | 2-Methoxyresorcinol                                                                                                              | C7 H8 O3       | 140.0458              | 38,539,952 |
| 210  | 3-Methyl-4-[2-(4-morpholinophenyl)hydrazono]-1-phenyl-4,5-dihydro-1H-pyrazol-5-one                                               | C20 H21 N5 O2  | 385.1483              | 38,526,023 |
| 211  | 9S,13R-12-Oxophytodienoic acid                                                                                                   | C18 H28 O3     | 292.2012              | 38,119,466 |
| 212  | Arachidonic acid                                                                                                                 | C20 H32 O2     | 286.2263              | 37,101,625 |
| 213  | Cuminaldehyde                                                                                                                    | C10 H12 O      | 148.087               | 36,791,156 |
| 214  | Pulegone                                                                                                                         | C10 H16 O      | 152.1181              | 36,137,196 |
| 215  | NP-003399                                                                                                                        | C14 H12 O2     | 212.0813              | 36,003,314 |
| 216  | NP-020112                                                                                                                        | C30 H48 O2     | 440.3605              | 35,225,004 |

| List | Name                                                                                                                                                                     | Formula          | Molecular Weight (Da) | Area       |
|------|--------------------------------------------------------------------------------------------------------------------------------------------------------------------------|------------------|-----------------------|------------|
| 217  | (2R,3S,4S,5S,6R)-2-((7-hydroxy-4-((3Z)-5-hydroxy-3-methylpent-3-en-1-yl)-4a,8,8-trimethyl-3-methylidene-decahydronaphthalen-2-yl)oxy)-6-(hydroxymethyl)oxane-3,4,5-triol | C26 H44 O8       | 506.2946              | 35,207,040 |
| 218  | Schaftoside                                                                                                                                                              | C26 H28 O14      | 564.1401              | 34,699,760 |
| 219  | N-(2-(4-[5-(Acetylamino)-1H-benzimidazol-2-yl]phenyl)-1H-benzimidazol-5-yl)acetamide                                                                                     | C24 H20 N6 O2    | 424.1716              | 33,904,086 |
| 220  | Salsolinol                                                                                                                                                               | C10 H13 N O2     | 179.0927              | 33,796,582 |
| 221  | NP-008132                                                                                                                                                                | C20 H24 O9       | 430.1185              | 33,257,543 |
| 222  | 2,6-Dimethoxyphenol                                                                                                                                                      | C8 H10 O3        | 154.0613              | 33,068,750 |
| 223  | 3-{5-[(2S)-1-(4-Chlorobenzyl)-2-pyrrolidinyl]-1,2,4-oxadiazol-3-yl}-2-(2-methoxyethoxy)pyridine                                                                          | C21 H23 Cl N4 O3 | 436.1296              | 32,810,671 |
| 224  | NP-011548                                                                                                                                                                | C18 H34 O3       | 280.2369              | 32,694,515 |
| 225  | 5-fluoro AB-PINACA N-(4-hydroxypentyl) metabolite                                                                                                                        | C18 H25 F N4 O3  | 386.1811              | 31,861,743 |
| 226  | 6-Methylquinoline                                                                                                                                                        | C10 H9 N         | 143.0718              | 31,687,065 |
| 227  | Nicotinuric acid                                                                                                                                                         | C8 H8 N2 O3      | 180.0556              | 31,203,244 |
| 228  | NP-021018                                                                                                                                                                | C12 H18 O4       | 208.1077              | 31,035,152 |
| 229  | (1S,2S,4R,7E,11S)-4,8-dimethyl-12-methylidene-3,14-dioxatricyclo[9.3.0.0.0]tetradec-7-en-13-one                                                                          | C15 H20 O3       | 230.1279              | 30,944,116 |
| 230  | 10-Propoxydecanoic acid                                                                                                                                                  | C13 H26 O3       | 242.2005              | 30,925,139 |
| 231  | Diphenylphosphine oxide                                                                                                                                                  | C12 H11 O P      | 202.0525              | 30,854,834 |
| 232  | 3-(3,4-dihydroxyphenyl)propanoic acid                                                                                                                                    | C9 H10 O4        | 164.0456              | 29,678,071 |
| 233  | Nicotinamide                                                                                                                                                             | C6 H6 N2 O       | 122.0466              | 29,612,560 |
| 234  | (1S,3R,4S,5R)-3,5-bis(((2E)-3-(3,4-dihydroxyphenyl)prop-2-enoyl)oxy)-1,4-dihydroxycyclohexane-1-carboxylic acid                                                          | C25 H24 O12      | 516.1203              | 29,505,388 |
| 235  | Penbutolol                                                                                                                                                               | C18 H29 N O2     | 291.2165              | 29,081,029 |
| 236  | NP-004038                                                                                                                                                                | C16 H24 O3       | 246.159               | 28,950,112 |
| 237  | Heptanophenone                                                                                                                                                           | C13 H18 O        | 190.1338              | 28,427,034 |
| 238  | (3aR,5aR,9bR)-3a-hydroxy-5a,9-dimethyl-3-methylidene-2H,3H,3aH,4H,5H,5aH,6H,7H,8H,9bH-naphtho[1,2-b]furan-2-one                                                          | C15 H20 O3       | 270.1201              | 28,172,000 |
| 239  | Diphenylamine                                                                                                                                                            | C12 H11 N        | 169.0874              | 27,885,206 |
| 240  | Cyclo(phenylalanyl-prolyl)                                                                                                                                               | C14 H16 N2 O2    | 244.1181              | 27,273,229 |
| 241  | 4-Isopropyl-9H-thioxanthen-9-one                                                                                                                                         | C16 H14 O S      | 254.0734              | 27,187,080 |
| 242  | Etiocholanolone                                                                                                                                                          | C19 H30 O2       | 272.2109              | 26,205,231 |
| 243  | 3-Methoxy prostaglandin F1 $\alpha$                                                                                                                                      | C21 H38 O6       | 408.2439              | 25,992,019 |

| List | Name                                                                                                                                                             | Formula        | Molecular Weight (Da) | Area       |
|------|------------------------------------------------------------------------------------------------------------------------------------------------------------------|----------------|-----------------------|------------|
| 244  | (3aR,4aS,5R,7aS,8S,9aR)-5-Hydroxy-4a,8-dimethyl-3-methyleneoctahydroazuleno[6,5-b]furan-2,6(3H,4H)-dione                                                         | C15 H20 O4     | 264.133               | 25,619,491 |
| 245  | methyl 3-ethenyl-4-((6-[2-(4-hydroxyphenyl)ethyl]-4-oxooxan-2-yl)methyl)-2-[[3,4,5-trihydroxy-6-(hydroxymethyl)oxan-2-yl]oxy]-3,4-dihydro-2H-pyran-5-carboxylate | C29 H38 O12    | 600.209               | 25,528,060 |
| 246  | Luteolin                                                                                                                                                         | C15 H10 O6     | 286.0441              | 25,158,891 |
| 247  | 2-(tert-butyl)-6-(4-chlorophenyl)-4-(methylthio)pyridine                                                                                                         | C16 H18 Cl N S | 291.086               | 25,029,791 |
| 248  | Ethyl paraben                                                                                                                                                    | C9 H10 O3      | 166.0611              | 24,772,472 |
| 249  | (3S,4aR,5R,6R)-3,6-dihydroxy-4a,5-dimethyl-3-(prop-1-en-2-yl)-2,3,4,4a,5,6,7,8-octahydronaphthalen-2-one                                                         | C15 H22 O3     | 232.1433              | 24,707,449 |
| 250  | 4-Hydroxyephedrine                                                                                                                                               | C10 H15 N O2   | 163.0979              | 24,340,907 |
| 251  | (2S)-4-Oxo-2-phenyl-3,4-dihydro-2H-chromen-7-yl beta-D-glucopyranoside                                                                                           | C21 H22 O8     | 402.1266              | 24,304,502 |
| 252  | (2E)-2-(hydroxymethyl)-3-[3-oxo-5-(propan-2-yl)-1,3,4,5,6,7-hexahydro-2-benzofuran-4-yl]prop-2-enoic acid                                                        | C15 H20 O5     | 302.1095              | 24,025,622 |
| 253  | 5-(6-hydroxy-6-methyloctyl)-2,5-dihydrofuran-2-one                                                                                                               | C13 H22 O3     | 208.1439              | 23,986,648 |
| 254  | 6-(tert-butyl)pyridazin-3(2H)-one                                                                                                                                | C8 H12 N2 O    | 152.0932              | 23,904,057 |
| 255  | 2-sec-Butyl-3-methoxypyrazin                                                                                                                                     | C9 H14 N2 O    | 166.1087              | 23,840,812 |
| 256  | Acetylcholine                                                                                                                                                    | C7 H15 N O2    | 145.1085              | 23,731,706 |
| 257  | Linoleoyl ethanolamide                                                                                                                                           | C20 H37 N O2   | 323.2785              | 23,629,153 |
| 258  | (2S,3R,4S,5S,6R)-2-((4a,5,7-trihydroxy-7-methyl-1H,4aH,5H,6H,7H,7aH-cyclopenta[c]pyran-1-yl)oxy)-6-(hydroxymethyl)oxane-3,4,5-triol                              | C15 H24 O10    | 386.1142              | 23,535,839 |
| 259  | NP-001798                                                                                                                                                        | C16 H17 N O2   | 255.1231              | 23,489,644 |
| 260  | 4-decyl-3-hydroxy-5-oxoolane-2,3-dicarboxylic acid                                                                                                               | C16 H26 O7     | 352.1449              | 23,400,192 |
| 261  | 2-Isobutyl-3-methoxypyrazine                                                                                                                                     | C9 H14 N2 O    | 166.1086              | 23,015,572 |
| 262  | Pipecolic acid                                                                                                                                                   | C6 H11 N O2    | 129.0775              | 22,973,316 |
| 263  | N-Benzyl-2-[(3R,4S)-3-[[5-(cyclohexylmethyl)-1,2-oxazol-3-yl]methyl]-4-piperidinyl]-N-methylacetamide                                                            | C26 H37 N3 O2  | 445.2748              | 22,533,662 |
| 264  | NP-020705                                                                                                                                                        | C17 H24 O8     | 378.1245              | 22,533,166 |

| List | Name                                                                                                            | Formula       | Molecular Weight (Da) | Area       |
|------|-----------------------------------------------------------------------------------------------------------------|---------------|-----------------------|------------|
| 265  | Norharman                                                                                                       | C11 H8 N2     | 168.0669              | 22,381,368 |
| 266  | $\gamma$ -Linolenic acid ethyl ester                                                                            | C20 H34 O2    | 312.2628              | 22,291,201 |
| 267  | (2E)-3-[(1R,4S,7R,7aR)-1-hydroxy-3,7-dimethyl-2,4,5,6,7,7a-hexahydro-1H-inden-4-yl]-2-methylprop-2-enoic acid   | C15 H22 O3    | 232.1435              | 22,288,124 |
| 268  | 6,7-Dihydroxy-4-methylcoumarin                                                                                  | C10 H8 O4     | 192.0402              | 21,460,057 |
| 269  | NP-002336                                                                                                       | C23 H36 O5    | 409.2773              | 21,340,698 |
| 270  | $\alpha$ -Pinene-2-oxide                                                                                        | C10 H16 O     | 152.1185              | 21,322,644 |
| 271  | 1,2,3,4-Tetramethyl-1,3-cyclopentadiene                                                                         | C9 H14        | 122.1085              | 21,086,160 |
| 272  | Diundecyl phthalate                                                                                             | C30 H50 O4    | 496.3496              | 20,861,702 |
| 273  | NP-016721                                                                                                       | C15 H16 O4    | 282.0863              | 20,469,729 |
| 274  | [4-(2-methoxyphenyl)piperazino](4-methylphenyl)methanone                                                        | C19 H22 N2 O2 | 310.1729              | 20,357,449 |
| 275  | Uracil                                                                                                          | C4 H4 N2 O2   | 112.026               | 20,227,338 |
| 276  | NP-008198                                                                                                       | C26 H32 O13   | 574.1752              | 20,115,132 |
| 277  | 8Z,11Z,14Z-Eicosatrienoic acid                                                                                  | C20 H34 O2    | 306.2525              | 19,964,197 |
| 278  | 6-Methoxyquinoline                                                                                              | C10 H9 N O    | 159.0669              | 19,903,165 |
| 279  | 4,8-dihydroxy-6,6,8-trimethyl-1H,3H,4H,4aH,5H,6H,7H,7aH,8H,9H-azuleno[5,6-c]furan-1-one                         | C15 H22 O4    | 288.1328              | 19,869,631 |
| 280  | Methylhippuric acid                                                                                             | C10 H11 N O3  | 193.0719              | 19,711,927 |
| 281  | Palmitoyl ethanolamide                                                                                          | C18 H37 N O2  | 299.2787              | 19,705,843 |
| 282  | 3-(2,6-Dioxocyclohexyl)propanenitrile                                                                           | C9 H11 N O2   | 165.0769              | 19,583,327 |
| 283  | 2-Methoxybenzaldehyde                                                                                           | C8 H8 O2      | 136.0515              | 19,349,457 |
| 284  | NP-016437                                                                                                       | C15 H24 O5    | 306.1405              | 19,214,653 |
| 285  | NP-020713                                                                                                       | C20 H26 O4    | 330.1766              | 18,891,579 |
| 286  | (1R,3R,4S,5R)-3,4-bis([(2E)-3-(3,4-dihydroxyphenyl)prop-2-enoyl]oxy)-1,5-dihydroxycyclohexane-1-carboxylic acid | C25 H24 O12   | 498.1113              | 18,870,286 |
| 287  | 5,10,15-trimethyl-4,9,13-trioxatetracyclo[10.3.0.0.0]penta-1(15)-en-14-one                                      | C15 H20 O4    | 246.1226              | 18,681,670 |
| 288  | (-)-Epicatechin                                                                                                 | C15 H14 O6    | 290.0756              | 18,476,297 |
| 289  | PD 0200347                                                                                                      | C10 H17 N3 O2 | 211.1335              | 18,436,988 |
| 290  | 1-(3,4-dimethoxyphenyl)ethan-1-one oxime                                                                        | C10 H13 N O3  | 177.077               | 18,405,606 |
| 291  | Prolylleucine                                                                                                   | C11 H20 N2 O3 | 228.1445              | 18,386,393 |
| 292  | Benzyl 6-O-beta-D-glucopyranosyl-beta-D-glucopyranoside                                                         | C19 H28 O11   | 454.1381              | 18,341,336 |
| 293  | 4,6-Dimethyl-2(1H)-pyrimidinone                                                                                 | C6 H8 N2 O    | 124.0622              | 18,255,886 |
| 294  | Tetranor-12R-HETE                                                                                               | C16 H26 O3    | 248.1746              | 18,178,612 |
| 295  | NP-008882                                                                                                       | C27 H48 O9    | 538.3046              | 17,867,532 |

| List | Name                                                                                                           | Formula          | Molecular Weight (Da) | Area       |
|------|----------------------------------------------------------------------------------------------------------------|------------------|-----------------------|------------|
| 296  | Scoparone                                                                                                      | C11 H10 O4       | 206.0553              | 17,852,271 |
| 297  | N-{4-[(2R,3R)-3-(Hydroxymethyl)-5-oxo-4-(4-pyridinylmethyl)-2-morpholinyl]phenyl}-4-(trifluoromethyl)benzamide | C25 H22 F3 N3 O4 | 507.1317              | 17,687,990 |
| 298  | Dulcitol                                                                                                       | C6 H14 O6        | 182.0823              | 17,408,410 |
| 299  | Azobenzene                                                                                                     | C12 H10 N2       | 182.0831              | 17,159,521 |
| 300  | 4-[[5-(6-Hydroxy-5,5,8a-trimethyl-2-methylenedecahydro-1-naphthalenyl)-3-methylpentyl]oxy]-4-oxobutanoic acid  | C24 H40 O5       | 390.2729              | 17,091,735 |
| 301  | 4'-Methoxyacetophenone                                                                                         | C9 H10 O2        | 150.0663              | 16,893,301 |
| 302  | Esculetin                                                                                                      | C9 H6 O4         | 178.0245              | 16,749,625 |
| 303  | 3-(4-Nitrophenyl)imidazo[1,5-a]pyridine                                                                        | C13 H9 N3 O2     | 239.0682              | 16,479,751 |
| 304  | NP-002089                                                                                                      | C15 H22 O3       | 272.1361              | 16,444,281 |
| 305  | N-(2,4-Dimethylphenyl)formamide                                                                                | C9 H11 N O       | 149.0825              | 16,154,582 |
| 306  | Zaleplon                                                                                                       | C17 H15 N5 O     | 305.1237              | 15,997,293 |
| 307  | 6-Acetylmorphine                                                                                               | C19 H21 N O4     | 327.1431              | 15,965,597 |
| 308  | 13(S)-HOTrE                                                                                                    | C18 H30 O3       | 294.2158              | 15,954,057 |
| 309  | NP-000295                                                                                                      | C17 H22 O4       | 312.1325              | 15,767,872 |
| 310  | Heroin                                                                                                         | C21 H23 N O5     | 369.1528              | 15,501,729 |
| 311  | (3aR,7aS,8S,9aR)-5,8-dimethyl-3-methylidene-2H,3H,3aH,4H,6H,7H,7aH,8H,9H,9aH-azuleno[6,5-b]furan-2,6-dione     | C15 H18 O3       | 246.1227              | 15,419,277 |
| 312  | 4-Methylumbelliferyl- $\alpha$ -D-glucopyranoside                                                              | C16 H18 O8       | 338.0955              | 15,357,162 |
| 313  | 2-[[2-(1H-indol-3-yl)ethyl]ethanimidoyl]phenol                                                                 | C18 H18 N2 O     | 278.1463              | 15,344,890 |
| 314  | N-{4-[(2R,3R)-3-(Hydroxymethyl)-4-methyl-5-oxo-2-morpholinyl]phenyl}-2-methylbenzamide                         | C20 H22 N2 O4    | 392.1191              | 15,237,300 |
| 315  | 2-[(5R,8S,8aS)-3,8-dimethyl-2-oxo-1,2,4,5,6,7,8,8a-octahydroazulen-5-yl]prop-2-enoic acid                      | C15 H20 O3       | 230.1281              | 15,047,930 |
| 316  | 8,8-dimethyl-2H,8H-pyrano[3,2-g]chromen-2-one                                                                  | C14 H12 O3       | 228.0758              | 15,022,886 |
| 317  | Buspirone                                                                                                      | C21 H31 N5 O2    | 385.2422              | 15,015,423 |
| 318  | 1-(2,4-dihydroxyphenyl)-2-(3,5-dimethoxyphenyl)propan-1-one                                                    | C17 H18 O5       | 324.0947              | 14,833,751 |
| 319  | Thymine                                                                                                        | C5 H6 N2 O2      | 126.0416              | 14,704,546 |
| 320  | 3',4'-Dimethyl- $\alpha$ -ethylaminovalerophenone                                                              | C15 H23 N O      | 233.1751              | 14,531,645 |
| 321  | Dehydroepiandrosterone (DHEA)                                                                                  | C19 H28 O2       | 288.2053              | 14,390,832 |
| 322  | NP-021868                                                                                                      | C15 H14 O4       | 240.0759              | 14,314,532 |
| 323  | N-Acetylhistamine                                                                                              | C7 H11 N3 O      | 153.0884              | 13,978,793 |

| List | Name                                                                                                                  | Formula          | Molecular Weight (Da) | Area       |
|------|-----------------------------------------------------------------------------------------------------------------------|------------------|-----------------------|------------|
| 324  | NP-021085                                                                                                             | C17 H26 O3       | 260.1741              | 13,528,614 |
| 325  | 2-(piperidinomethylidene)malononitrile                                                                                | C9 H11 N3        | 161.0936              | 13,422,221 |
| 326  | mesityl(piperidin-4-yl)methanone hydrochloride                                                                        | C15 H21 N O      | 231.1597              | 13,411,287 |
| 327  | 2-[4-(3-Amino-2-hydroxypropoxy)phenyl]acetamide                                                                       | C11 H16 N2 O3    | 224.1135              | 13,259,920 |
| 328  | 3-(4-hydroxyphenyl)-5-methoxy-7-[[[(2S,3R,4S,5S,6R)-3,4,5-trihydroxy-6-(hydroxymethyl)oxan-2-yl]oxy]-4H-chromen-4-one | C22 H22 O10      | 468.0976              | 13,076,977 |
| 329  | 3-(5-Cyclopropyl-1,3,4-oxadiazol-2-yl)-2-[(4-methylphenyl)thio]pyridine                                               | C17 H15 N3 O S   | 309.0964              | 13,068,237 |
| 330  | 8-(2,3-dihydroxy-3-methylbutyl)-7-methoxy-2H-chromen-2-one                                                            | C15 H18 O5       | 300.0958              | 12,941,355 |
| 331  | 2-[(1S,4S,5S)-4-{{[(Ethylcarbamoyl)amino]methyl}-5-isopropyl-2-methyl-2-cyclohexen-1-yl]-N-(4-methoxybenzyl)acetamide | C24 H37 N3 O3    | 415.2824              | 12,878,588 |
| 332  | NP-020293                                                                                                             | C7 H14 N2 O3     | 196.0827              | 12,867,566 |
| 333  | N-(4-piperidinophenyl)-2-thiophenecarboxamide                                                                         | C16 H18 N2 O S   | 308.099               | 12,768,996 |
| 334  | (-)-Strychnine                                                                                                        | C21 H22 N2 O2    | 334.1717              | 12,744,644 |
| 335  | 3-[(4-hydroxyphenyl)methyl]-octahydropyrrolo[1,2-a]pyrazine-1,4-dione                                                 | C14 H16 N2 O3    | 260.1126              | 12,742,909 |
| 336  | NP-022238                                                                                                             | C20 H22 N2 O     | 306.1771              | 12,620,869 |
| 337  | Sedanolide                                                                                                            | C12 H18 O2       | 176.1179              | 12,503,179 |
| 338  | 4-hydroxy-6-[2-(2-methyl-1,2,4a,5,6,7,8,8a-octahydronaphthalen-1-yl)ethyl]oxan-2-one                                  | C18 H28 O3       | 314.1821              | 12,399,291 |
| 339  | 6,7,8-trimethoxy-2-(2-phenoxy-3-pyridyl)-4H-3,1-benzoxazin-4-one                                                      | C22 H18 N2 O6    | 428.1028              | 12,157,122 |
| 340  | 2-[(4-cyclopropyl-5-hydroxy-4H-1,2,4-triazol-3-yl)sulfanyl]-1-(2,3-dihydro-1,4-benzodioxin-6-yl)-1-ethanone           | C15 H15 N3 O4 S  | 333.0798              | 11,972,567 |
| 341  | Benzoguanamine                                                                                                        | C9 H9 N5         | 187.0822              | 11,890,538 |
| 342  | Rilmenidine                                                                                                           | C10 H16 N2 O     | 180.1245              | 11,681,064 |
| 343  | NP-019401                                                                                                             | C11 H15 N O2     | 193.1082              | 11,526,016 |
| 344  | N-[[[(2R,4S,5S)-5-Ethynyl-1-azabicyclo[2.2.2]oct-2-yl]methyl]-2-naphthamide                                           | C21 H22 N2 O     | 318.1768              | 11,439,391 |
| 345  | 3-(3-pyridylamino)-2-[4-(trifluoromethoxy)benzoyl]acrylonitrile                                                       | C16 H10 F3 N3 O2 | 333.0781              | 11,133,019 |
| 346  | 3-Succinoylpyridine                                                                                                   | C9 H9 N O3       | 179.0563              | 11,040,457 |
| 347  | 1-Phenyl-3-methyl-5-pyrazolone                                                                                        | C10 H10 N2 O     | 174.0774              | 10,858,965 |

| List | Name                                                                                                            | Formula         | Molecular Weight (Da) | Area       |
|------|-----------------------------------------------------------------------------------------------------------------|-----------------|-----------------------|------------|
| 348  | Pyrimethamine                                                                                                   | C12 H13 Cl N4   | 248.0807              | 10,710,465 |
| 349  | Artemisinin                                                                                                     | C15 H22 O5      | 264.1307              | 10,662,530 |
| 350  | 2-(2-acetyl-3,5-dihydroxyphenyl)acetic acid                                                                     | C10 H10 O5      | 192.0402              | 10,443,016 |
| 351  | Carbofuran                                                                                                      | C12 H15 N O3    | 221.1026              | 10,442,463 |
| 352  | Ergocalciferol                                                                                                  | C28 H44 O       | 396.3354              | 10,414,786 |
| 353  | 10-Nitrooleate                                                                                                  | C18 H33 N O4    | 349.2207              | 10,152,263 |
| 354  | (2S,3R)-2-(3,4-dihydroxyphenyl)-3,5-dihydroxy-3,4-dihydro-2H-1-benzopyran-7-yl 3,4,5-trihydroxybenzoate         | C22 H18 O10     | 442.0846              | 10,078,644 |
| 355  | Naringenin                                                                                                      | C15 H12 O5      | 272.0653              | 10,027,835 |
| 356  | Irganox 1035                                                                                                    | C38 H58 O6 S    | 664.3885              | 10,003,353 |
| 357  | (3aR,4aS,5R,6S,8S,9aR)-5,6-dihydroxy-4a,8-dimethyl-3-methylidene-dodecahydroazuleno[6,5-b]furan-2-one           | C15 H22 O4      | 248.1382              | 9,961,772  |
| 358  | (1R,4aS,5R,8aS)-5-(5-hydroxy-3-methylpentyl)-1,4a-dimethyl-6-methylidene-decahydronaphthalene-1-carboxylic acid | C20 H34 O3      | 339.273               | 9,842,456  |
| 359  | 7-hydroxy-6-methoxy-2H-chromen-2-one                                                                            | C10 H8 O4       | 192.0402              | 9,832,967  |
| 360  | (3R,4R)-4-Hydroxy-3-((4-[2-(4-morpholinyl)ethoxy]benzoyl)amino)-N-phenyl-1-azepanecarboxamide                   | C26 H34 N4 O5   | 504.2305              | 9,782,871  |
| 361  | N-Feruloyloctopamine                                                                                            | C18 H19 N O5    | 311.1121              | 9,774,591  |
| 362  | Maltotetraose                                                                                                   | C24 H42 O21     | 688.1966              | 9,733,988  |
| 363  | (1S,2S,4aR,7R,8aR)-1-[(3Z)-5-hydroxy-3-methylpent-3-en-1-yl]-2,5,5,8a-tetramethyl-decahydronaphthalene-2,7-diol | C20 H36 O3      | 346.2443              | 9,652,952  |
| 364  | 11(Z),14(Z),17(Z)-Eicosatrienoic acid                                                                           | C20 H34 O2      | 306.2521              | 9,365,538  |
| 365  | Debrisoquine                                                                                                    | C10 H13 N3      | 175.1097              | 9,185,763  |
| 366  | 5,7-dihydroxy-2-(3-hydroxy-4-methoxyphenyl)-3,6-dimethoxy-4H-chromen-4-one                                      | C18 H16 O8      | 360.0801              | 9,130,052  |
| 367  | 4-morpholinobenzoic acid                                                                                        | C11 H13 N O3    | 207.0871              | 8,968,512  |
| 368  | HET0016                                                                                                         | C12 H18 N2 O    | 228.1236              | 8,940,585  |
| 369  | 5-[(1E)-3-hydroxy-3-methylbut-1-en-1-yl]-2-methylcyclohex-5-ene-1,2,4-triol                                     | C12 H20 O4      | 250.1153              | 8,915,535  |
| 370  | NP-000124                                                                                                       | C12 H20 O4      | 250.1156              | 8,915,535  |
| 371  | NP-007111                                                                                                       | C35 H58 O9      | 639.4208              | 8,802,503  |
| 372  | Phloroglucinol                                                                                                  | C6 H6 O3        | 126.0302              | 8,687,334  |
| 373  | NP-006888                                                                                                       | C13 H24 O4      | 266.1465              | 8,608,883  |
| 374  | ethyl 4-[(4-methylphenyl)sulfonyl]amino}tetrahydro-1(2H)-pyridinecarboxylate                                    | C15 H22 N2 O4 S | 364.09                | 8,589,136  |



| List | Name                                                                                                                                      | Formula         | Molecular Weight (Da) | Area      |
|------|-------------------------------------------------------------------------------------------------------------------------------------------|-----------------|-----------------------|-----------|
| 375  | [(2R,3S,4S,5R,6R)-6-[2-(3,4-dihydroxyphenyl)ethoxy]-3,4,5-trihydroxyoxan-2-yl]methyl (2E)-3-(3,4-dihydroxyphenyl)prop-2-enoate            | C23 H26 O11     | 478.1426              | 8,463,364 |
| 376  | Wogonin                                                                                                                                   | C16 H12 O5      | 284.0651              | 8,367,490 |
| 377  | 2-Hydroxyquinoline                                                                                                                        | C9 H7 N O       | 145.0511              | 8,300,054 |
| 378  | 3-Phenylpropionitrile                                                                                                                     | C9 H9 N         | 90.0452               | 8,179,167 |
| 379  | NP-011878                                                                                                                                 | C15 H26 O5      | 308.1563              | 8,129,868 |
| 380  | NP-011150                                                                                                                                 | C22 H24 O8      | 454.103               | 8,079,253 |
| 381  | 5 $\alpha$ -Dihydrotestosterone glucuronide                                                                                               | C25 H38 O8      | 466.2496              | 7,982,458 |
| 382  | Mepanipyrim                                                                                                                               | C14 H13 N3      | 223.1082              | 7,916,105 |
| 383  | NP-019748                                                                                                                                 | C30 H48 O5      | 510.3252              | 7,826,258 |
| 384  | N-((1S,4S,6S)-6-Isopropyl-3-methyl-4-[2-oxo-2-(1-pyrrolidiny)ethyl]-2-cyclohexen-1-yl)methyl)-2-pyrazinecarboxamide                       | C22 H32 N4 O2   | 406.2281              | 7,451,731 |
| 385  | Apigetrin                                                                                                                                 | C21 H20 O10     | 432.1003              | 7,450,390 |
| 386  | (2R)-5-hydroxy-7-methoxy-2-phenyl-3,4-dihydro-2H-1-benzopyran-4-one                                                                       | C16 H14 O4      | 270.0858              | 7,400,693 |
| 387  | 7-Aminoflunitrazepam                                                                                                                      | C16 H14 F N3 O  | 283.1174              | 7,288,007 |
| 388  | Albendazole-2-aminosulfone                                                                                                                | C10 H13 N3 O2 S | 239.0679              | 7,198,178 |
| 389  | Aflatoxin B2                                                                                                                              | C17 H14 O6      | 314.0751              | 6,996,550 |
| 390  | (4aS,5R,6S,8aS)-5-[(3E)-5-methoxy-3-methyl-5-oxopent-3-en-1-yl]-5,6,8a-trimethyl-3,4,4a,5,6,7,8,8a-octahydronaphthalene-1-carboxylic acid | C21 H32 O4      | 348.2265              | 6,963,068 |
| 391  | NP-016596                                                                                                                                 | C19 H30 O8      | 408.1713              | 6,871,022 |
| 392  | Cytisine                                                                                                                                  | C11 H14 N2 O    | 190.1082              | 6,802,962 |
| 393  | (3E,12E)-3,12-Dimethyl-8-methylene-6,18-dioxatricyclo[14.2.1.05,9]nonadeca-3,12,16(19)-triene-7,17-dione                                  | C20 H24 O4      | 310.153               | 6,786,418 |
| 394  | (2R)-1-(5-hydroxy-3-methylpentyl)-2,5,5,8a-tetramethyl-decahydronaphthalen-2-ol                                                           | C20 H38 O2      | 292.2733              | 6,650,316 |
| 395  | (9cis)-Retinal                                                                                                                            | C20 H28 O       | 284.2107              | 6,564,013 |
| 396  | 2-[6-(1H-benzo[d]imidazol-2-yl)-2-pyridyl]-1H-benzo[d]imidazole                                                                           | C19 H13 N5      | 311.1125              | 6,489,108 |
| 397  | [3-((3-((Cyclopropylmethyl)amino)-3-oxetanyl)methyl)-1,2-oxazol-5-yl]methanol                                                             | C12 H18 N2 O3   | 238.1286              | 6,455,610 |
| 398  | 2-{3-hydroxy-5-[(E)-2-(4-hydroxyphenyl)ethenyl]phenoxy}-6-(hydroxymethyl)oxane-3,4,5-triol                                                | C20 H22 O8      | 390.1264              | 6,452,913 |
| 399  | NP-001928                                                                                                                                 | C19 H18 O8      | 374.0954              | 6,436,781 |
| 400  | JWH 018 adamantyl carboxamide                                                                                                             | C24 H32 N2 O    | 386.239               | 6,384,503 |

| List | Name                                                                                                                                   | Formula       | Molecular Weight (Da) | Area      |
|------|----------------------------------------------------------------------------------------------------------------------------------------|---------------|-----------------------|-----------|
| 401  | AL 8810 Methyl ester                                                                                                                   | C25 H33 F O4  | 438.2205              | 6,361,755 |
| 402  | 5-Methoxyindole                                                                                                                        | C9 H9 N O     | 147.0666              | 6,089,400 |
| 403  | 4-(anilinomethylidene)-3-methyl-4,5-dihydroisoxazol-5-one                                                                              | C11 H10 N2 O2 | 202.0722              | 5,938,247 |
| 404  | N5-methyl-3-(1-adamantyl)-1,2,4-thiadiazol-5-amine                                                                                     | C13 H19 N3 S  | 249.1335              | 5,772,940 |
| 405  | PV8                                                                                                                                    | C17 H25 N O   | 259.19                | 5,722,026 |
| 406  | 2-{2-[(6-methoxy-2-morpholinopyridin-3-yl)amino]-2-oxoethoxy}acetic acid                                                               | C14 H19 N3 O6 | 325.1275              | 5,289,956 |
| 407  | (3aR,4S,6R,11aR)-6,9-Dihydroxy-6,10-dimethyl-3-methylene-2,7-dioxo-2,3,3a,4,5,6,7,8,9,11a-decahydrocyclodeca[b]furan-4-yl methacrylate | C19 H24 O7    | 386.1308              | 5,105,020 |
| 408  | 2-[(2S,3R,4S,5R)-5-(Aminomethyl)-3,4-dihydroxytetrahydro-2-furanyl]-N-(4-methoxybenzyl)acetamide                                       | C15 H22 N2 O5 | 348.1151              | 4,772,110 |
| 409  | Testosterone enanthate                                                                                                                 | C26 H40 O3    | 400.3013              | 4,675,684 |
| 410  | 4,6-dihydroxy-5a-methyl-3-methylidene-2-oxo-dodecahydronaphtho[1,2-b]furan-9-carbaldehyde                                              | C15 H20 O5    | 280.1274              | 4,265,171 |
| 411  | Codeine                                                                                                                                | C18 H21 N O3  | 299.1481              | 4,239,551 |
| 412  | Testosterone cypionate                                                                                                                 | C27 H40 O3    | 412.2944              | 3,940,585 |
| 413  | 5-[(4-methoxyphenyl)methylene]-3-phenyl-2,5-dihydro-1,2,4-triazin-6(1H)-one                                                            | C17 H15 N3 O2 | 293.1233              | 3,606,741 |
| 414  | 2-Arachidonoyl glycerol                                                                                                                | C23 H38 O4    | 378.2723              | 2,962,038 |
